# Supplementary material for: Patterning rubrene crystalline thin films for sub-micrometer channel length field-effect transistor arrays
Source: Royal Society of Chemistry journal article supplement (doi:10.1039/c4tc01590h), 2014-01-01
Supplement: c4tc01590h1.pdf [file c4tc01590h1.pdf]

## Supporting Information

### Patterning rubrene crystalline thin film for sub-micrometer channel length field-effect transistor arrays

Juan Zhu,<sup>‡a</sup> Wenchong Wang,<sup>‡a</sup> Qigang Zhong,<sup>b</sup> Liqiang Li,<sup>a</sup> Chuan Du,<sup>a</sup> Aifeng Lv,<sup>a</sup> Hong Wang,<sup>a</sup> Harald Fuchs,<sup>a</sup> and Lifeng Chi<sup>\*ab</sup>

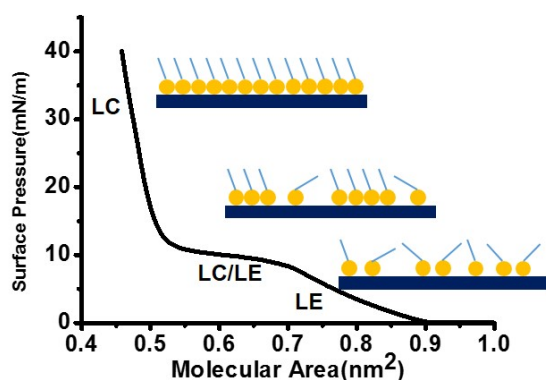

Figure S1. Surface pressure-molecular area ( $\pi$ -A) isotherm of DPPC ( $\sim 25$  °C) and schematic illustration of the corresponding conformations of the DPPC molecules for three characterized phases: liquid-expanded (LE) phase, liquid-condensed (LC) phase and LE/LC co-existing phase, respectively. The molecular packing density and order parameter in LC phase are much higher than in LE phase. Herein the SiO<sub>2</sub> substrates with pre-templates are transferred at high surface pressure of 40 mN/m in order to get homogeneous monolayer with densely packed DPPC molecules on SiO<sub>2</sub> substrates.

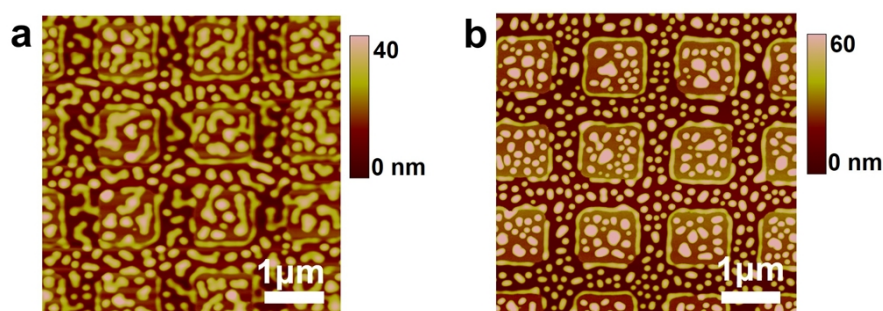

Figure S2. Topographic AFM images of rubrene deposited on Au patterned SiO<sub>2</sub> substrates without DPPC monolayer. (a) as grown, (b) annealing at 80 °C for 8 hours.
